# Supplementary material for: Impact of an active lifestyle on heart rate variability and oxidative stress markers in offspring of hypertensives
Source: PubMed Central journal article supplement (PMC7382460; doi:10.1038/s41598-020-69104-w), 2020-07-24

# IMPACT OF AN ACTIVE LIFESTYLE ON HEART RATE VARIABILITY AND OXIDATIVE STRESS MARKERS IN OFFSPRING OF HYPERTENSIVES.

F.A. SANTA ROSA, PhD, G.L. SHIMOJO, PhD, D.S. DIAS, PhD, A. VIANA, MSc, F.C. LANZA, PhD, M.C. IRIGOYEN, MD, PhD, K. DE ANGELIS, PhD

## Supplementary data

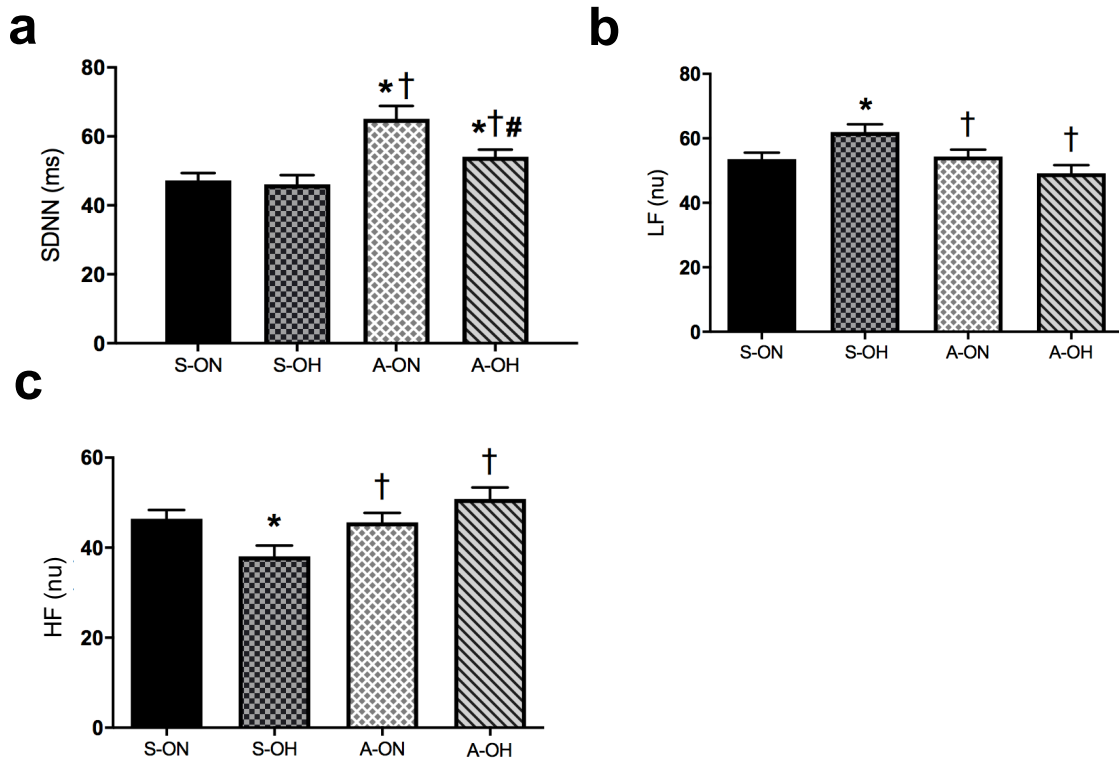

Supplement: 41598_2020_69104_MOESM1_ESM.pdf [file 41598_2020_69104_MOESM1_ESM.pdf]
